# Supplementary material for: Bioimaging of C2C12 Muscle Myoblasts Using Fluorescent Carbon Quantum Dots Synthesized from Bread
Source: MDPI journal article supplement (doi:10.3390/nano10081575), 2020-08-11
Supplement: s1 [file s1]

## Supplementary Materials: Bioimaging of C2C12 Muscle Myoblasts Using Fluorescent Carbon Quantum Dots Synthesized from Bread

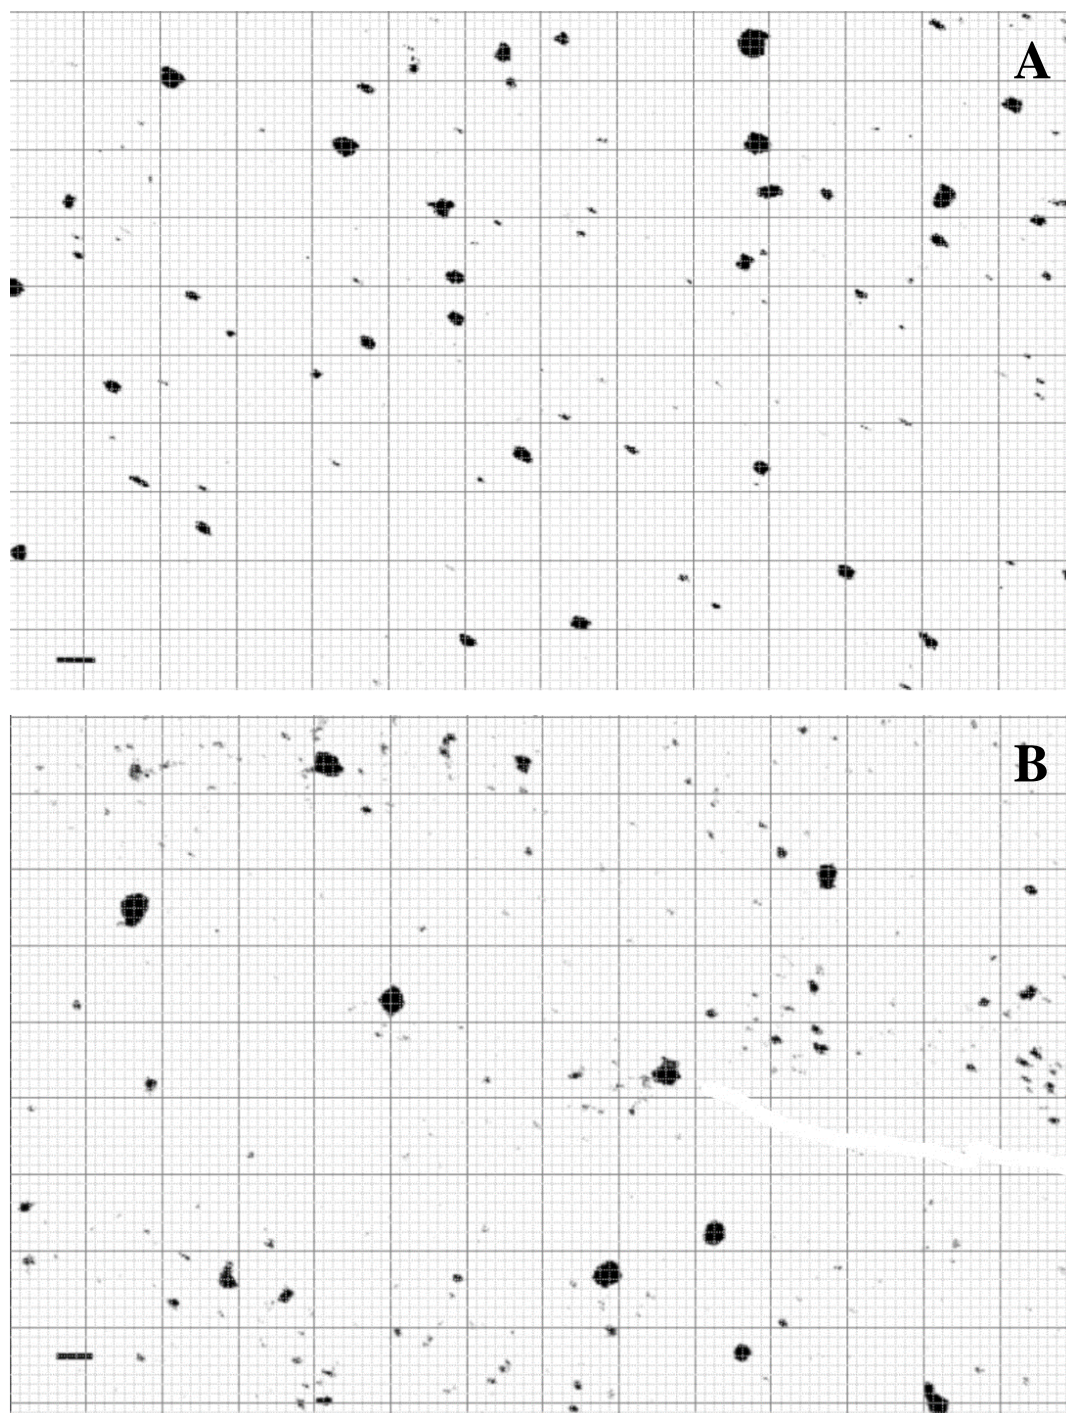

**Figure S1.** The contrast enhanced TEM images of CQD-A (A) and CQD-B (B).
